# Supplementary material for: Ordered and carbon-doped porous polymeric graphitic carbon nitride nanosheets toward enhanced visible light absorption and efficient photocatalytic H2 evolution
Source: Royal Society of Chemistry journal article supplement (doi:10.1039/d3nr04270g), 2023-01-01
Supplement: d3nr04270g1.pdf [file d3nr04270g1.pdf]

## **Supporting information**

### **Ordered and carbon-doped porous polymeric graphitic carbon nitride nanosheets toward enhanced visible light absorption and efficient photocatalytic H<sub>2</sub> evolution**

Rama Krishna Chava\*, Misook Kang\*\*

Department of Chemistry, College of Natural Sciences, Yeungnam University, 280 Daehak-Ro, Gyeongsan, Gyeongbuk 38541, Republic of Korea.

#### **Corresponding Author's Address:**

Dr. Rama Krishna Chava (Email: [drcrkphysics@hotmail.com](mailto:drcrkphysics@hotmail.com), [rama@ynu.ac.kr](mailto:rama@ynu.ac.kr))

Prof. Misook Kang (Email: [mskang@ynu.ac.kr](mailto:mskang@ynu.ac.kr))

Department of Chemistry, College of Natural Sciences, Yeungnam University, 280 Daehak-Ro, Gyeongsan-38541, Gyeongbuk, Republic of Korea.

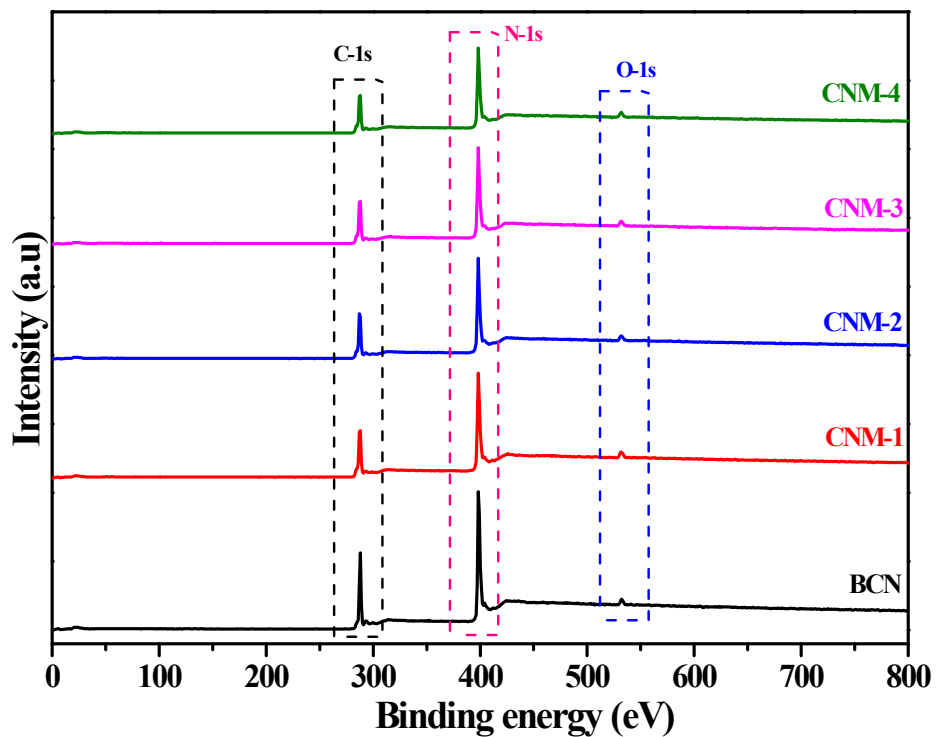

Figure S1. The XPS survey scan spectra of BCN and CNM samples.

| Sample | C-1s  | N-1s  | C/N   |
|--------|-------|-------|-------|
| BCN    | 41.61 | 56.29 | 0.739 |
| CNM-1  | 42.35 | 54.61 | 0.775 |
| CNM-2  | 42.18 | 55.04 | 0.766 |
| CNM-3  | 42.40 | 54.76 | 0.774 |
| CNM-4  | 42.76 | 54.23 | 0.788 |

Table S1. Atomic ratios of C and N elements in the prepared GCN samples

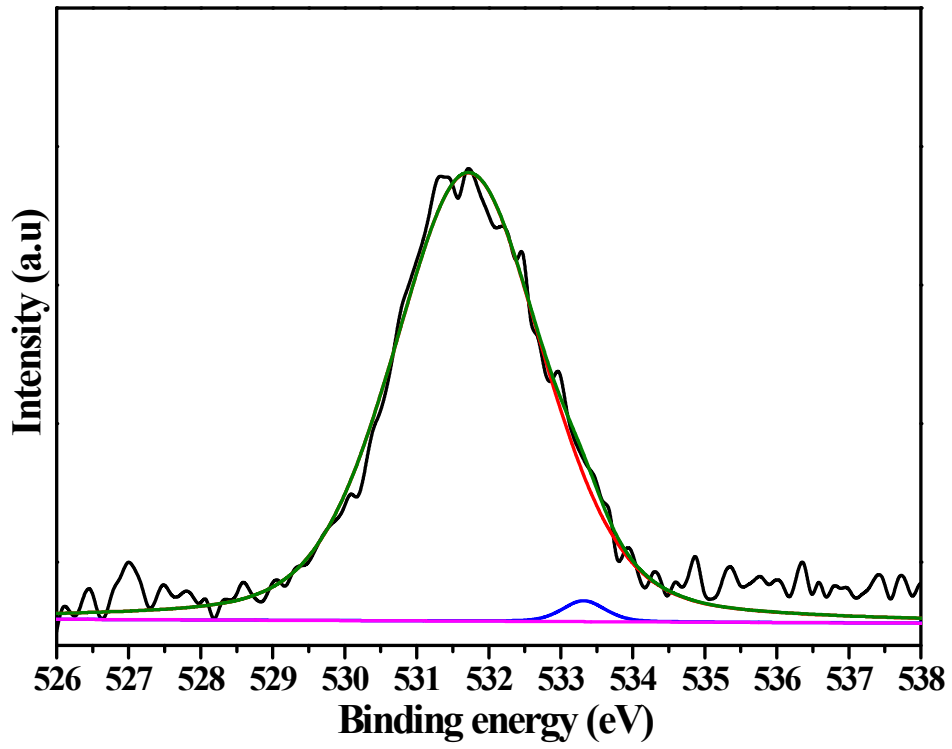

Figure S2. The XPS survey scan spectra of O-1s element in CNM-3 sample.

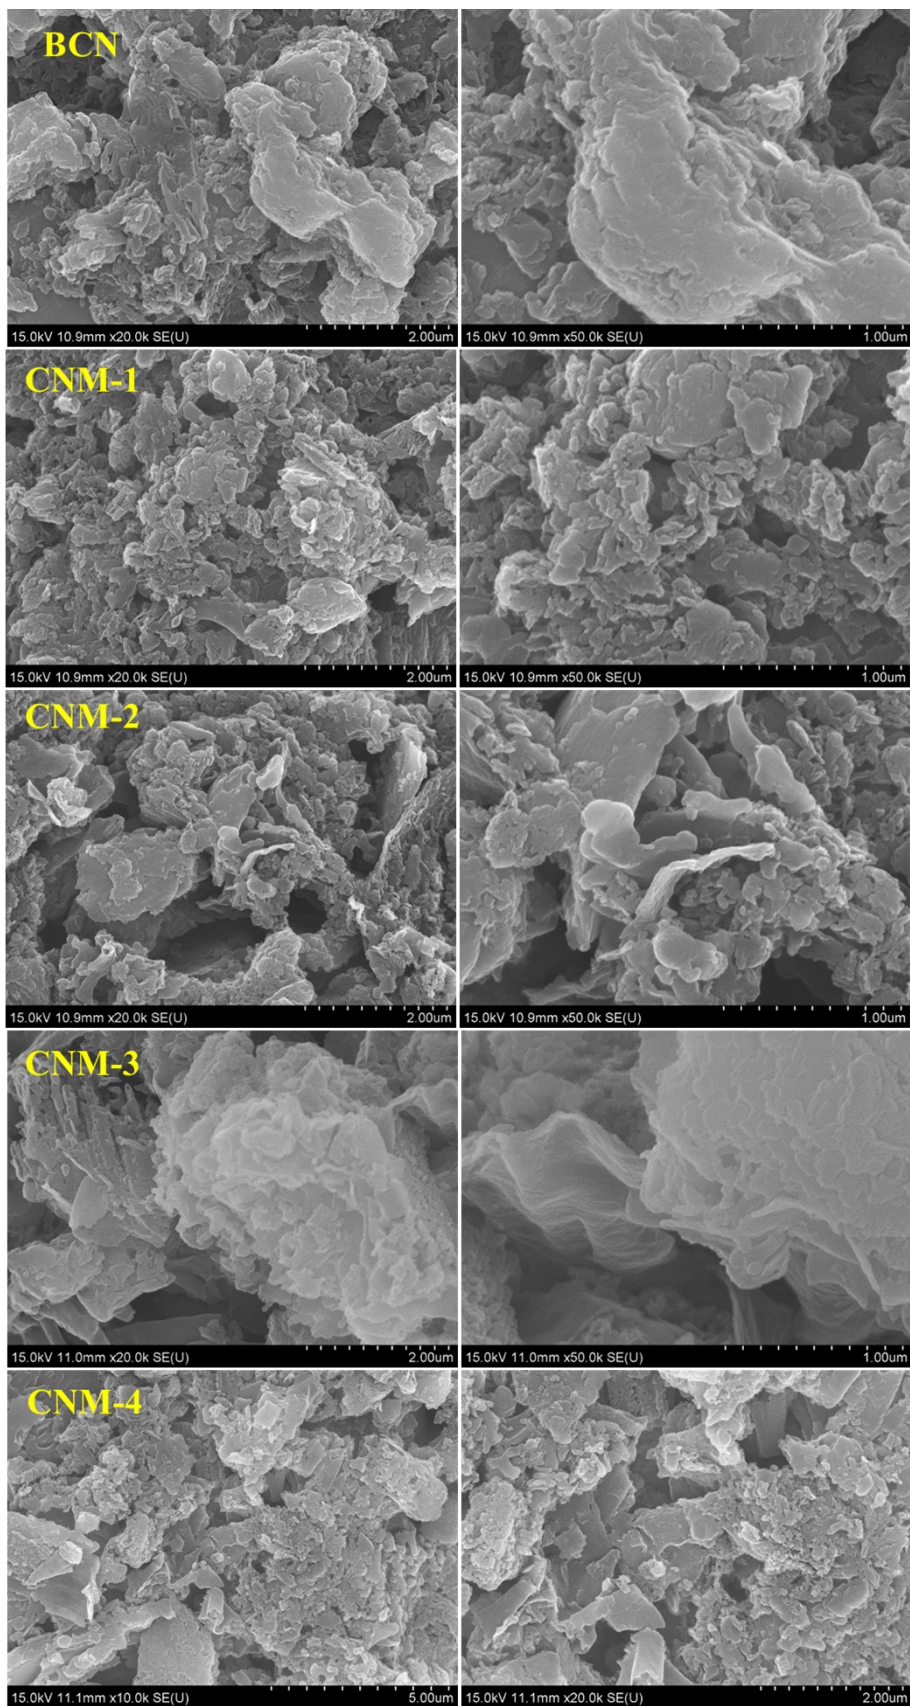

Figure S3. FE-SEM images of BCN and CNM photocatalyst samples

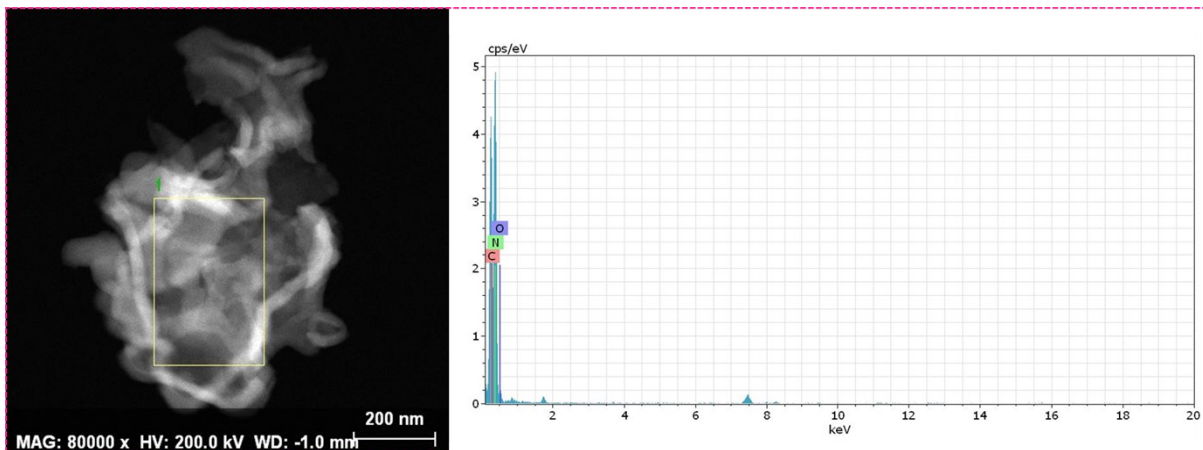

Figure S4. STEM-EDX spectral analysis of CNM-3 sample.

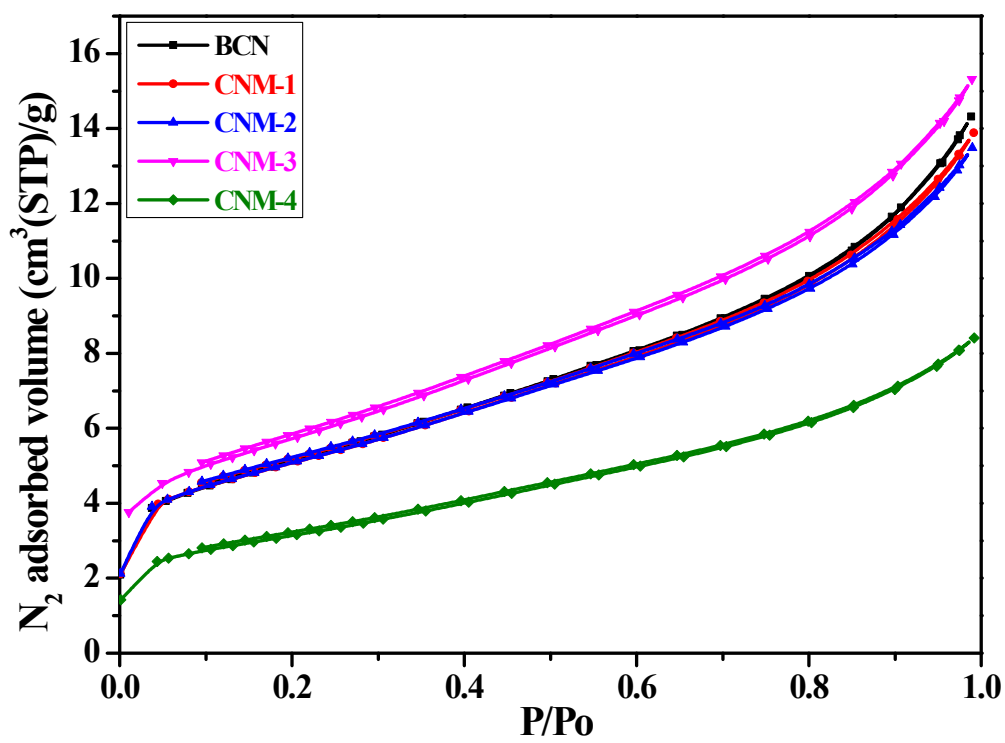

Figure S5. N<sub>2</sub> adsorption-desorption isotherms of BCN and CNM samples.

Table S2. The comparison of photocatalytic H<sub>2</sub> evolution activity of g-C<sub>3</sub>N<sub>4</sub> sample (CNM-3) derived from malonic acid treated melamine precursors with some previously reported g-C<sub>3</sub>N<sub>4</sub>-photocatalysts.

| <b>Photocatalyst</b>                               | <b>H<sub>2</sub> evolution Activity</b> | <b>Light source</b>                     | <b>Reference</b> |
|----------------------------------------------------|-----------------------------------------|-----------------------------------------|------------------|
| 3D g-C <sub>3</sub> N <sub>4</sub>                 | 29 μmol/h                               | λ > 420 nm<br>300 W Xe lamp             | 1                |
| Holey g-C <sub>3</sub> N <sub>4</sub>              | 82.9 μmol/h                             | λ > 420 nm<br>300 W Xe lamp             | 2                |
| Porous g-C <sub>3</sub> N <sub>4</sub>             | 316.7 μmol/h                            | λ > 400 nm<br>300 W Xe lamp             | 3                |
| Porous g-C <sub>3</sub> N <sub>4</sub>             | 1.8 μmol/h                              | λ > 420 nm<br>300 W Xe lamp             | 4                |
| g-C <sub>3</sub> N <sub>4</sub> nanosheets         | 170.5 μmol/h                            | λ > 400 nm<br>300 W Xe lamp             | 5                |
| Carbon-rich g-C <sub>3</sub> N <sub>4</sub>        | 39.6 μmol/h<br>8.6 μmol/h               | λ > 400 nm<br>λ > 420 nm; 300 W Xe lamp | 6                |
| C-self doped g-C <sub>3</sub> N <sub>4</sub>       | 25.3 μmol/h                             | λ > 400 nm<br>300 W Xe lamp             | 7                |
| C-rich g-C <sub>3</sub> N <sub>4</sub>             | 125.1 μmol/h/g                          | λ > 420 nm<br>300 W Xe lamp             | 8                |
| Porous crystalline g-C <sub>3</sub> N <sub>4</sub> | 1010 μmol/h/g                           | λ > 420 nm<br>4 LEDs                    | 9                |

|                                                       |                       |                                        |                  |
|-------------------------------------------------------|-----------------------|----------------------------------------|------------------|
| Amine bridged g-C <sub>3</sub> N <sub>4</sub>         | 157 μmol/h/g          | λ > 420 nm<br>300 W Xe lamp            | 10               |
| Heptazine bridged g-C <sub>3</sub> N <sub>4</sub>     | 372 μmol/h            | λ > 400 nm<br>300 W Xe lamp            | 11               |
| Crystalline g-C <sub>3</sub> N <sub>4</sub>           | 150 μmol/h            | White LED light<br>50 W                | 12               |
| C-rich g-C <sub>3</sub> N <sub>4</sub>                | 551.5 μmol/h          | λ > 400 nm<br>300 W Xe lamp            | 13               |
| Defect- g-C <sub>3</sub> N <sub>4</sub>               | 504 μmol/h/g          | λ > 420 nm<br>300 W Xe lamp            | 14               |
| H-bond broken g-C <sub>3</sub> N <sub>4</sub>         | 580 μmol/h/g          | λ > 440 nm<br>300 W Xe lamp            | 15               |
| N-rich g-C <sub>3</sub> N <sub>4</sub>                | 15.5 μmol/h           | λ > 420 nm<br>4 LEDs                   | 16               |
| O-doped g-C <sub>3</sub> N <sub>4</sub>               | 1748 μmol/h/g         | λ > 400 nm<br>300 W Xe lamp            | 17               |
| g-C <sub>3</sub> N <sub>4</sub> with N-vacancies      | 652 μmol/h/g          | λ > 420 nm<br>300 W Xe lamp            | 18               |
| In-plane ordered g-C <sub>3</sub> N <sub>4</sub>      | 420 μmol/h            | λ > 420 nm<br>300 W Xe lamp            | 19               |
| g-C <sub>3</sub> N <sub>4</sub> with cyanamide groups | 8 μmol/h/g            | λ > 400 nm<br>300 W Xe lamp            | 20               |
| <b>Porous C-rich g-C<sub>3</sub>N<sub>4</sub></b>     | <b>663.6 μmol/h/g</b> | <b>λ &gt; 420 nm<br/>150 W Xe lamp</b> | <b>This work</b> |

---

- (1) Q. H. Liang, Z. Li, X. L. Yu, Z. H. Huang, F. Y. Kang, Q. H. Yang, Macroscopic 3D Porous Graphitic Carbon Nitride Monolith for Enhanced Photocatalytic Hydrogen Evolution, *Adv. Mater.* 2015, 27, 4634-4639.
- (2) Q. H. Liang, Z. Li, Z. H. Huang, F. Y. Kang, Q. H. Yang, Holey Graphitic Carbon Nitride Nanosheets with Carbon Vacancies for Highly Improved Photocatalytic Hydrogen Production, *Adv. Funct. Mater.* 2015, 25, 6885-6892.
- (3) P. J. Yang, J. H. Zhao, W. Qiao, L. Li, Z. P. Zhu, Ammonia-induced robust photocatalytic hydrogen evolution of graphitic carbon nitride, *Nanoscale* 2015, 7, 18887-18890.
- (4) Q. Gu, Y. S. Liao, L. S. Yin, J. L. Long, X. X. Wang, C. Xue, Template-free synthesis of porous graphitic carbon nitride microspheres for enhanced photocatalytic hydrogen generation with high stability, *Appl. Catal. B* 2015, 165, 503-510.
- (5) P. Niu, L. L. Zhang, G. Liu, H. M. Cheng, Graphene-Like Carbon Nitride Nanosheets for Improved Photocatalytic Activities, *Adv. Funct. Mater.* 2012, 22, 4763-4770
- (6) Li, Y. F.; Yang, M.; Xing, Y.; Liu, X. C.; Yang, Y.; Wang, X.; Song, S. Y. Preparation of Carbon-Rich g-C<sub>3</sub>N<sub>4</sub> Nanosheets with Enhanced Visible Light Utilization for Efficient Photocatalytic Hydrogen Production. *Small* 13, 2017, 1701552.
- (7) Guohui Dong, Kun Zhao and Lizhi Zhang, Carbon self-doping induced high electronic conductivity and photoreactivity of g-C<sub>3</sub>N<sub>4</sub>, *Chem. Commun.*, 2012, 48, 6178–6180.
- (8) Zhou Chen, Ting-Ting Fan, Xiang Yu, Qiu-Ling Wu, Qiu-Hui Zhu, Li-Zhong Zhang, Jian-Hui Li, Wei-Ping Fang and Xiao-Dong Yi, Gradual carbon doping of graphitic carbon nitride towards metal-free visible light photocatalytic hydrogen evolution, *J. Mater. Chem. A*, 2018, 6, 15310–15319.
- (9) Xinhe Wu, Haiqin Ma, Wei Zhong, Jiajie Fan, Huogen Yu, Porous crystalline g-C<sub>3</sub>N<sub>4</sub>: Bifunctional NaHCO<sub>3</sub> template-mediated synthesis and improved photocatalytic H<sub>2</sub>-evolution rate, *Applied Catalysis B: Environmental* 271 (2020) 118899.
- (10) Dawoon Jang, Seungjoo Choi, Nam Hee Kwon, Kyung Yeon Jang, Suyeon Lee, Tae-Woo Lee, Seong-Ju Hwang, Hyungjun Kim, Jeongho Kim, Sungjin Park, Water-assisted formation of amine-bridged carbon nitride: A structural insight into the photocatalytic performance for H<sub>2</sub> evolution under visible light, *Applied Catalysis B: Environmental* 310 (2022) 121313.
- (11) Dong Liu, Shengtao Chen, Yuexing Zhang, Renjie Li, Tianyou Peng, Modulating the bridging units of carbon nitride for highly efficient charge separation and visible-light-



- responsive photocatalytic H<sub>2</sub> evolution, *Applied Catalysis B: Environmental* 333 (2023) 122805.
- (12) Guigang Zhang, Guosheng Li, Zhi-An Lan, Lihua Lin, Aleksandr Savateev, Tobias Heil, Spiros Zafeiratos, Xinchun Wang, and Markus Antonietti, Optimizing Optical Absorption, Exciton Dissociation, and Charge Transfer of a Polymeric Carbon Nitride with Ultrahigh Solar Hydrogen Production Activity, *Angew. Chem. Int. Ed.* 2017, 56, 13445–13449.
- (13) Shuo Zhao, Yuepeng Liu, Yanyun Wang, Liying Xie, Jiasheng Fang, Yiwei Zhang, Yuming Zhou, and Shuping Zhuo, C-Rich Graphitic Carbon Nitride with Cross Pore Channels: A VisibleLight-Driven Photocatalyst for Water Splitting, *ACS Appl. Energy Mater.* 2021, 4, 1784–1792.
- (14) Huihui Deng, Yushuai Jia, Wenquan Wang, Shengliang Zhong, Renqin Hao, Linjie Fan, and Xin Liu, Defect and Crystallinity-Mediated Charge Separation in Carbon Nitride for Synergistically Boosted Solar-Driven Hydrogen Evolution, *ACS Sustainable Chem. Eng.* 2023, 11, 13736–13746.
- (15) Yuyang Kang, Yongqiang Yang, Li-Chang Yin, Xiangdong Kang, Lianzhou Wang, Gang Liu and Hui-Ming Cheng, Selective Breaking of Hydrogen Bonds of Layered Carbon Nitride for Visible Light Photocatalysis, *Adv. Mater.* 2016, 28, 6471–6477.
- (16) Xinhe Wu, Duoduo Gao, Ping Wang, Huogen Yu, Jiaguo Yu, NH<sub>4</sub>Cl-induced low-temperature formation of nitrogen-rich g-C<sub>3</sub>N<sub>4</sub> nanosheets with improved photocatalytic hydrogen evolution, *Carbon* 2019, 153, 757-766.
- (17) Chao Wang, Huiqing Fan, Xiaohu Ren, Jiangwei Ma, Jiawen Fang, and Weijia Wang, Hydrothermally Induced Oxygen Doping of Graphitic Carbon Nitride with a Highly Ordered Architecture and Enhanced Photocatalytic Activity, *ChemSusChem* 2018, 11, 700–708.
- (18) Zhengdong Xu, Yang Chen, Binghao Wang, Yu Ran, Junbo Zhong, Minjiao Li, Highly selective photocatalytic CO<sub>2</sub> reduction and hydrogen evolution facilitated by oxidation induced nitrogen vacancies on g-C<sub>3</sub>N<sub>4</sub>, *Journal of Colloid and Interface Science* 651 (2023) 645–658.
- (19) Guixia Zhao, Guigao Liu, Hong Pang, Huimin Liu, Huabin Zhang, Kun Chang, Xianguang Meng, Xiaojun Wang, and Jinhua Ye, Improved Photocatalytic H<sub>2</sub> Evolution over G-Carbon Nitride with Enhanced In-Plane Ordering, *Small*, 2016, 12, 6160-6166.

- (20) Vincent Wing-hei Lau, Igor Moudrakovski, Tiago Botari, Simon Weinberger, Maria B. Mesch, Viola Duppel, Juergen Senker, Volker Blum, Bettina V. Lotsch, Rational design of carbon nitride photocatalysts by identification of cyanamide defects as catalytically relevant sites, *Nat. Commun.* 2016, 7, 12165.
